# Supplementary material for: Noncovalent surface grafting of uranium complexed cucurbit[5]uril oligomer onto palm shell powder: a novel approach for selective uranyl ion extraction
Source: Royal Society of Chemistry journal article supplement (doi:10.1039/c2an35497g), 2012-01-01
Supplement: c2an35497g.pdf [file c2an35497g.pdf]

# Noncovalent Surface Grafting of Uranium complexed Cucurbit[5]uril Oligomer onto Palm Shell Powder: A Novel Approach for selective Uranyl ion Extraction

S. Kushwaha<sup>a</sup> and Padmaja P. Sudhakar<sup>a\*</sup>

*Received (in XXX, XXX) Xth XXXXXXXXXX 20XX, Accepted Xth XXXXXXXXXX 20XX*

DOI: 10.1039/b000000x

## Experimental.

### *Synthesis of Ion Imprinted oligomer and Grafted Ion Imprinted oligomer.*

The U2CB[5] complex was synthesized as reported earlier. After complexation, hydroxylation and allylation of the complex was done according to a reported procedure [46] to form the monomer. Polymerisation was performed by refluxing 25mg monomer, 10mg AIBN (initiator) and 10mL methanol (porogen) under nitrogen atmosphere in a three neck flask at 55°C in thermostatically controlled oil bath with constant stirring for 10h. After completion of reaction, excess methanol was distilled off under reduced pressure and dried under reduced pressure in vacuum oven for 12h to obtain ion imprinted oligomer (IU2CB[5]). IU2CB[5] was then grafted to, palm shell powder (PSP) by dry impregnation method for 12h to get PGIU2CB[5]. Control oligomer (CCB[5]) and PSP grafted control oligomer (CPGCB[5]) were similarly prepared in the absence of the template (UO<sub>2</sub>)<sup>2+</sup>.

### *Leaching of the template.*

The imprint ion UO<sub>2</sub><sup>2+</sup> was leached from IU2CB[5] and PGIU2CB[5] by sonication with 10 mL of 1N HClO<sub>4</sub> for 6h. The resultant material was dried in a vacuum oven at 60°C to obtain leached imprinted (LIU2CB[5]) and leached grafted imprinted oligomer (LPGIU2CB[5]). Leaching of imprint ion was tested for two cycles by ICP-AES.

### *Selectivity Studies.*

The selectivity of IU2CB5, PGIU2CB5, CU2CB5, CPGIU2CB5 for uranium over other inorganic ions was determined by shaking 20 mg of polymer particles with 25 ppm of Cu<sup>2+</sup>,

$\text{Cd}^{2+}$ ,  $\text{Zn}^{2+}$ ,  $\text{Cr}^{6+}$ ,  $\text{Fe}^{3+}$ ,  $\text{Cs}^+$  and  $\text{U}^{6+}$  present in 10 mL of deionized water at pH1 adjusted using  $\text{HNO}_3$ . The selectivity coefficient ( $S_{\text{UO}_2^{2+}/\text{M}^{n+}}$ ) is defined as

$$S_{\text{UO}_2^{2+}/\text{M}^{n+}} = \frac{D_{\text{UO}_2^{2+}}}{D_{\text{M}^{n+}}}$$

where  $D_{\text{UO}_2^{2+}}$  and  $D_{\text{M}^{n+}}$  are the distribution ratios of the uranyl ion and other inorganic species, respectively, with polymer particles (CU2CB5 or IU2CB5). These distribution ratios were calculated using the formula

$$D_{\text{M}^{n+}} = \frac{C_{\text{M}^{n+}}^i - C_{\text{M}^{n+}}^f}{C_{\text{M}^{n+}}^f} \times \frac{v}{m}$$

where  $C_i \text{M}^{n+}$  and  $C_f \text{M}^{n+}$  are the concentrations of inorganic ions in aqueous phase before and after extraction,  $v$  is the volume of the solution, and  $m$  is the mass of the polymer. The percent extraction ( $\%E$ ) of inorganic ion is defined as

$$\%E = \frac{C_{\text{M}^{n+}}^i - C_{\text{M}^{n+}}^f}{C_{\text{M}^{n+}}^i} \times 100$$

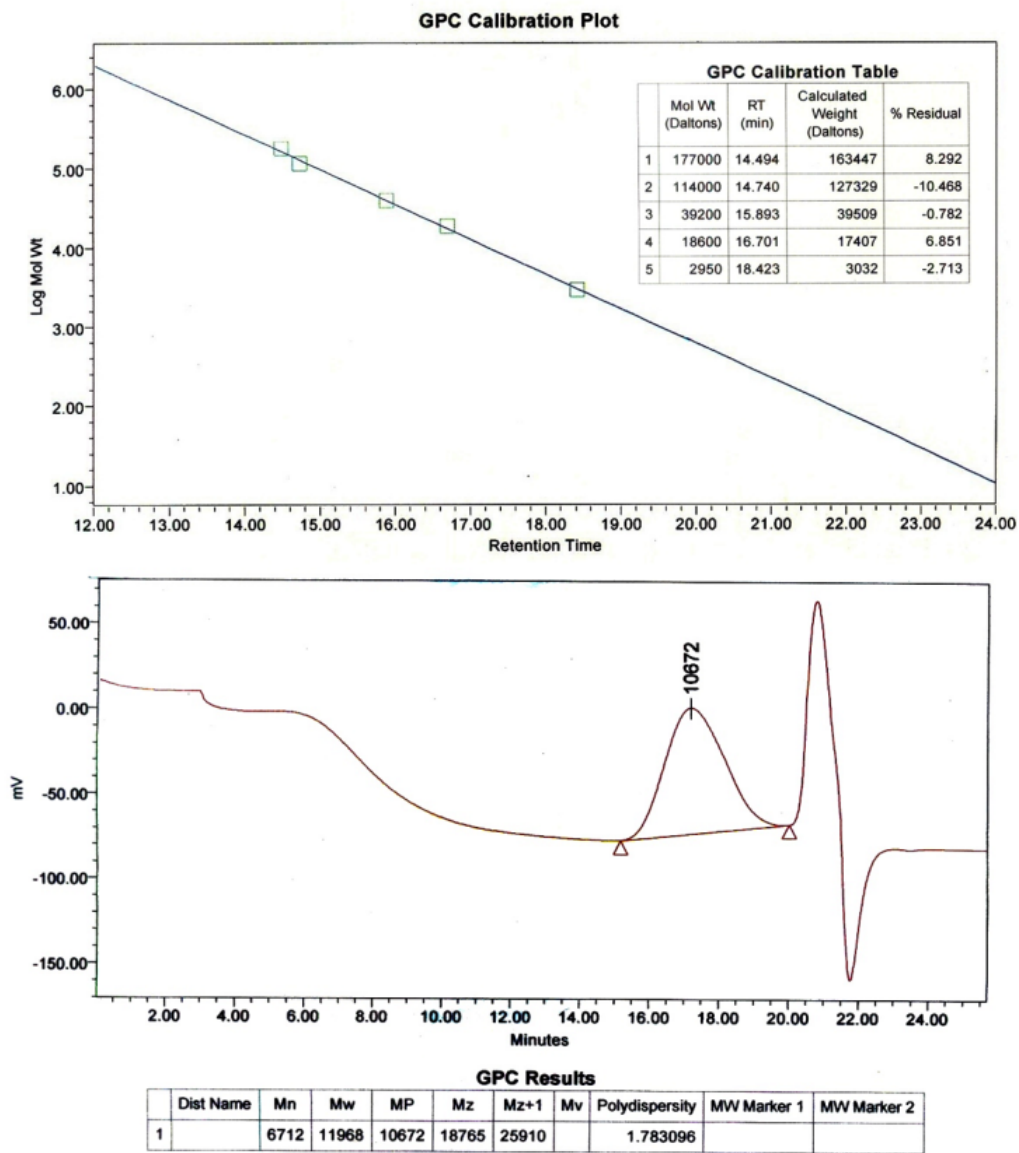

**Figure S1.** GPC calibration and experimental results for IU2CB5

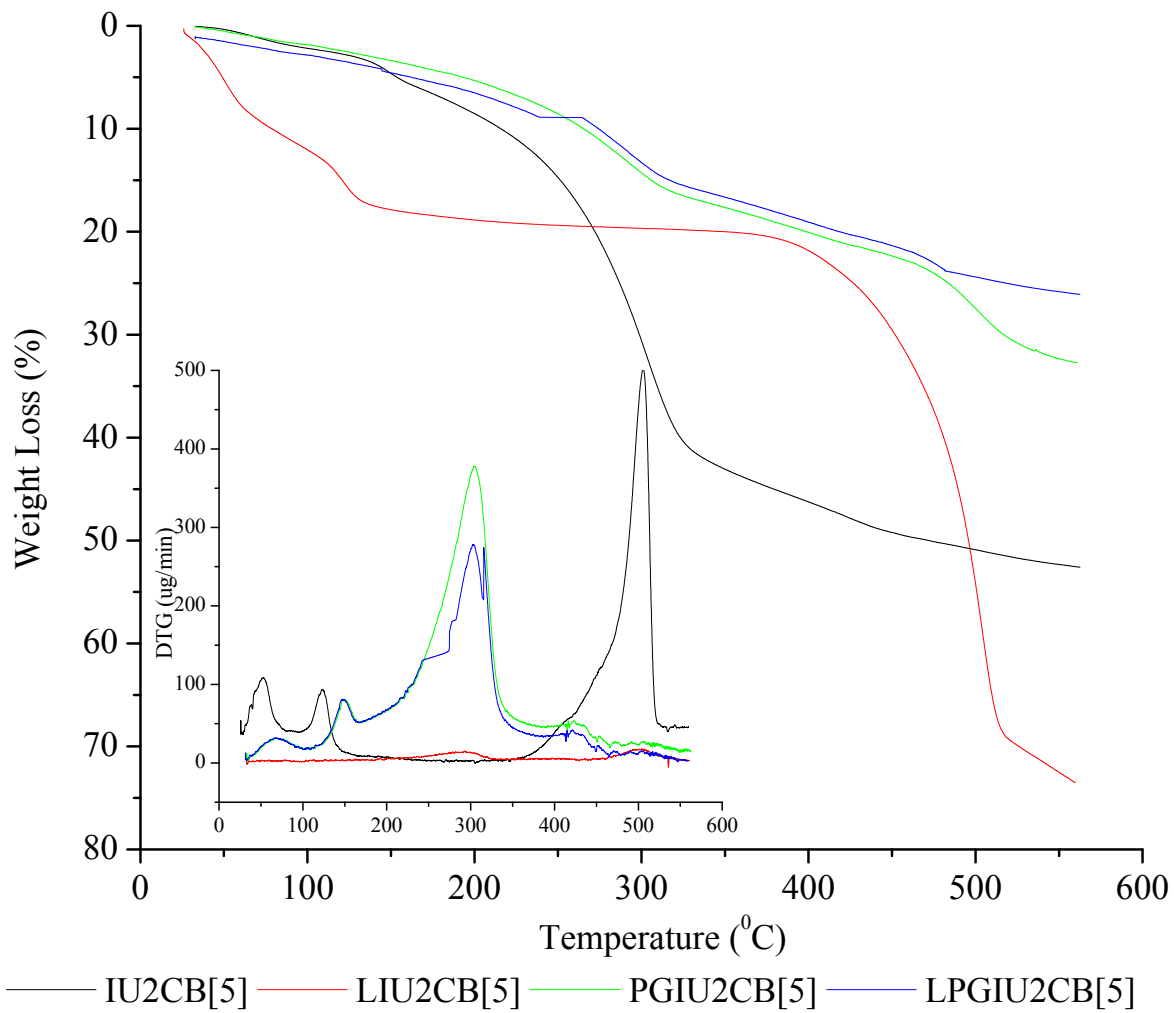

**Figure S2.** Thermal analysis TGA and DTG of IU2CB[5], PGIU2CB[5], LIU2CB[5] and LPGIU2CB[5]

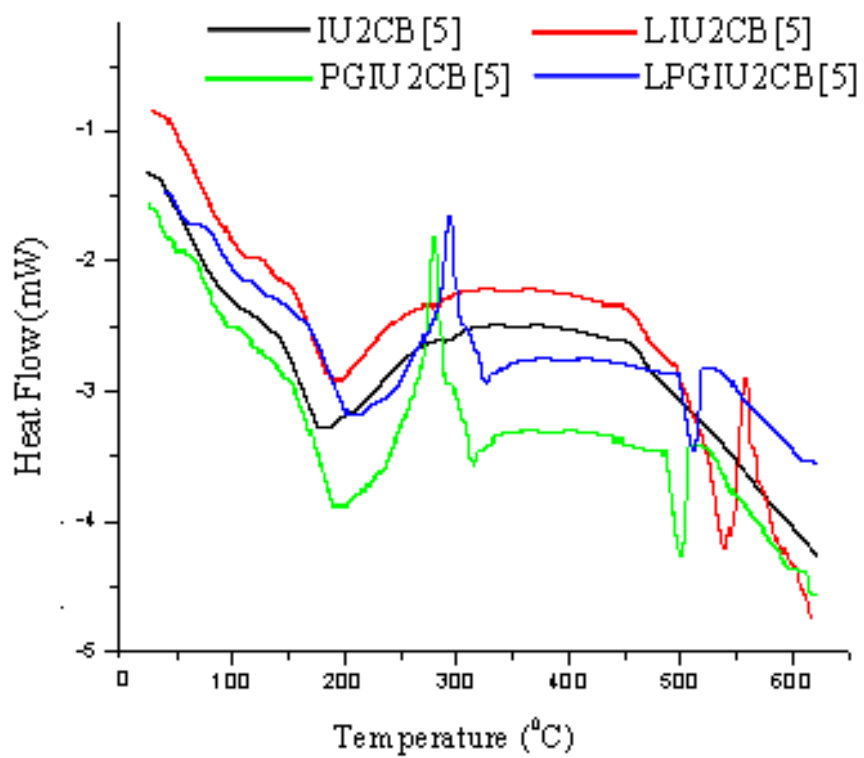

**Figure S3.** DSC analysis of IU2CB[5], PGIU2CB[5], LIU2CB[5] and LPGIU2CB[5]

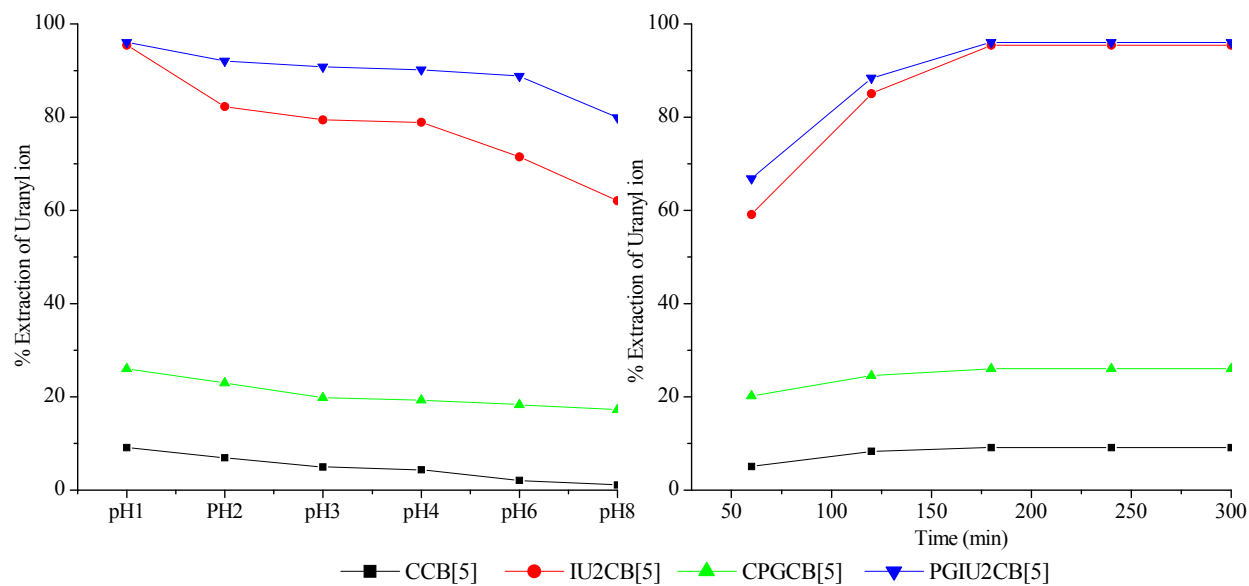

Operating parameters: pH: 1.0-9.0, 20 mg dosage, 30 °C, 180 rpm; 180 min, 1000 ppm of  $M^{2+}$

**Figure S4.** Extraction of uranyl ion with respect to pH and time

**Table S1.** FTIR spectral assignments

| Functiona<br>l groups                          | CB5                          | U2C<br>B [5]                    | CCB[5]                       | IU2CB[<br>5]                    | LIU2CB<br>[5]                | PSP                                  | CPGCB[5]                     | PGIU2CB<br>[5]                  | LPGIU2CB<br>[5]           |
|------------------------------------------------|------------------------------|---------------------------------|------------------------------|---------------------------------|------------------------------|--------------------------------------|------------------------------|---------------------------------|---------------------------|
| -C=O<br>Stretch                                | 1738                         | 1766                            | 1745                         | 1759                            | 1750                         | 1732                                 | 1742                         | 1764                            | 1732                      |
| -CH<br>Stretching<br>& bending                 | 3002<br>2941<br>1485<br>1382 | 3020<br>2924<br>2830<br>1381    | 2989<br>2915<br>2827<br>1380 | 2930<br>2915<br>2827<br>1380    | 2994<br>2932<br>2825<br>1390 | 2959<br>2895<br>1454<br>1430<br>1373 | 2991<br>2940<br>2833<br>1390 | 2991<br>2928<br>2832<br>1385    | 2959 2895<br>1454<br>1373 |
| Stretching<br>& bending<br>of H <sub>2</sub> O | 3439<br>1636                 | 3445<br>1695<br>1653            | 3429<br>1680                 | 3396<br>1692                    | 3401<br>1642<br>1670         | 1648                                 | 3402<br>1640<br>1670         | 3402<br>1639<br>1669            | 3391<br>1648              |
| -OH<br>stretching<br>& bending                 | -                            | -                               | -                            | -                               | -                            | 3361                                 | -                            | 3402                            | 3391                      |
| -C-O-<br>bending                               | -                            | -                               | 1044                         | 1256<br>1044                    | 1235<br>1052                 | 1250<br>1049                         | 1051                         | 1215<br>1057                    | 1254 1059                 |
| -C-H<br>bending                                | 959<br>793<br>630            | 964<br>788<br>624               | -                            | -                               | 964<br>788<br>624            | 893<br>809                           | -                            | 962<br>878<br>~710              | -                         |
| U-O<br>Stretch                                 | -                            | 579<br>480<br>445<br>948<br>859 | -                            | 580<br>481<br>448<br>951<br>864 | -                            | -                                    | -                            | 583<br>483<br>450<br>952<br>859 | -                         |

**Table S2.** EDX analysis of leached and unleached oligomers

---

| Elements | IU2CB[5] | PGIU2CB[5] | LIU2CB[5] | LPGIU2CB[5] |
|----------|----------|------------|-----------|-------------|
| C        | 19.37 %  | 26.24 %    | 28.89 %   | 35.75 %     |
| H        | 2.89 %   | 3.12 %     | 3.97 %    | 3.32 %      |
| N        | 19.11 %  | 11.09 %    | 23.76 %   | 13.17 %     |
| O        | 35.16 %  | 40.39 %    | 43.18 %   | 47.43 %     |
| U        | 22.94 %  | 19.16 %    | -         | -           |

Elemental analysis was carried out using JSM 5610 LV combined with INCA instrument for EDX analyzer for the quantitative identification of the elements on gold coated sample holders.
